# Supplementary material for: Template-Free Manufacturing of Defined Structure and Size Polymeric Microparticles
Source: MDPI journal article supplement (doi:10.3390/nano13222976), 2023-11-20
Supplement: s1 [file s1]

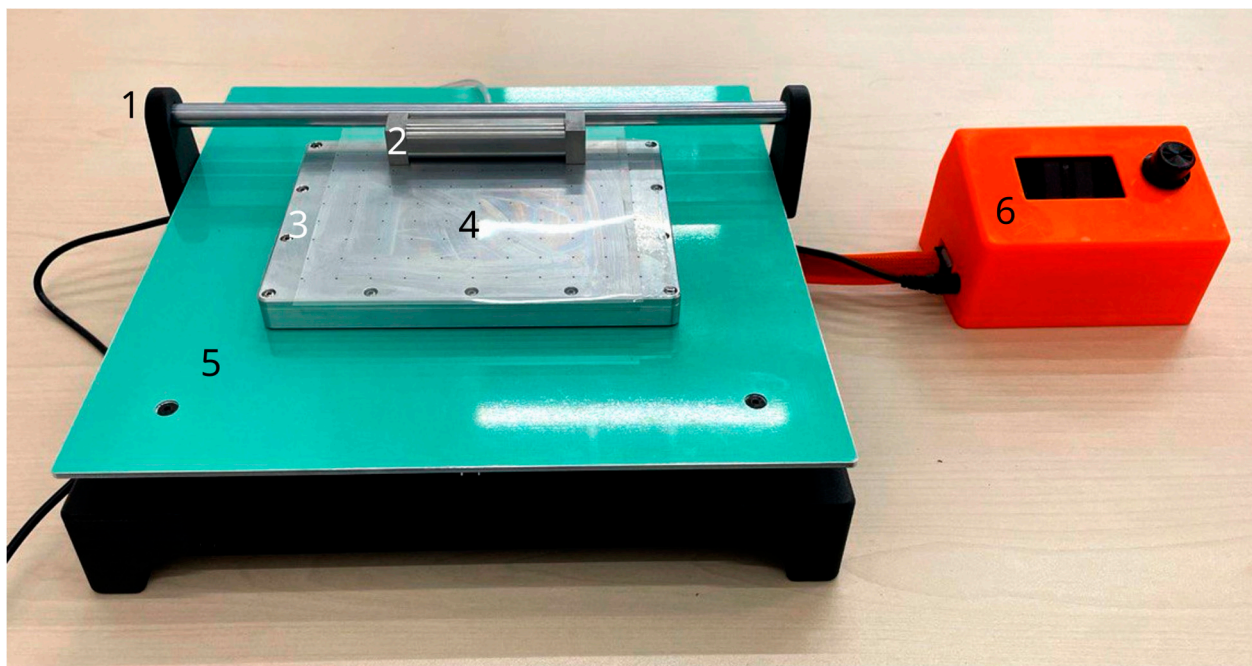

Figure S1. Home-build film applicator unit.

1. Moving bar
2. Baker film applicator with discrete gaps
3. Vacuum table for thin substrate fixation
4. FEP substrate
5. Base table
6. Control unit
